# Supplementary material
Source: PubMed Central journal article supplement (PMC4531348)
Supplement: supp_tpc.15.00105_TPC2015-00105-RAR1_Supplemental_Data.pdf [file supp_tpc.15.00105_TPC2015-00105-RAR1_Supplemental_Data.pdf]

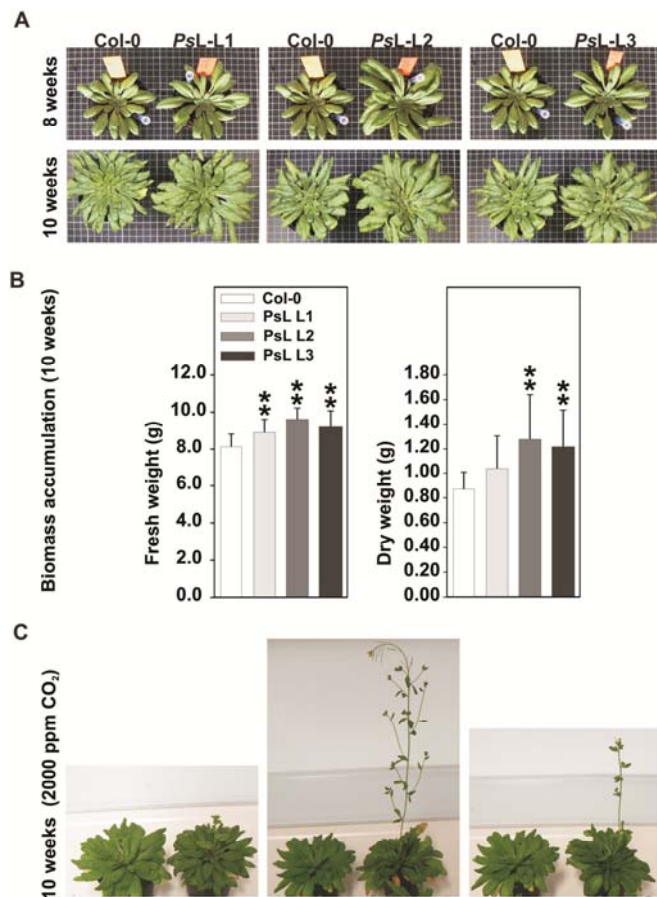

**Supplemental Figure 1.** Visual phenotype and biomass accumulation of *mtLPD* overexpressors.

Plants were grown under environmental controlled conditions with a photoperiod of 10/14 h and 20/18°C day/night, 75% relative humidity and a light intensity of ~120  $\mu\text{mol photons m}^{-2} \text{s}^{-1}$ . **(A)** Representative photographs of normal air grown plants (400 ppm CO<sub>2</sub>, 8 weeks upper panel and 10 weeks lower panel). **(B)** Biomass accumulation after 10 weeks of cultivation in normal air (values are expressed as means  $\pm$  SD; N = 8, \*\*p < 0.01). **(C)** Representative photographs of plants grown under elevated CO<sub>2</sub> concentrations (2000 ppm, 10 weeks).

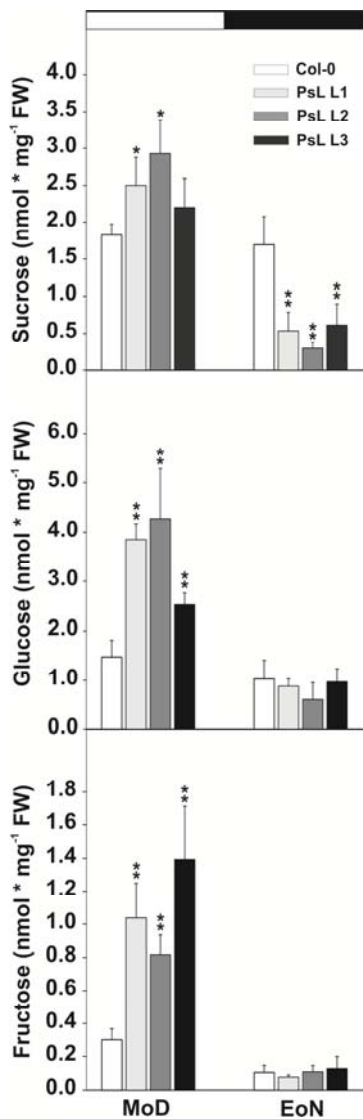

**Supplemental Figure 2.** Absolute sugar contents in *mtLPD* overexpressors.

Leaf material was harvested at two different time points (mid of day [MoD], in correlation with the harvesting time point of the <sup>13</sup>C labelling approach and at the end of night [EoN]) during a normal day/night-cycle from plants at growth stage 5.1 according to Boyes et al., (2001) and absolute steady-state contents of soluble sugars analysed by GC. Values are mean ± SD of five independent biological replicates. Values marked with asterisks were significantly different from the wild-type control based Student's *t*-test (\**p* < 0.05; \*\**p* < 0.01).

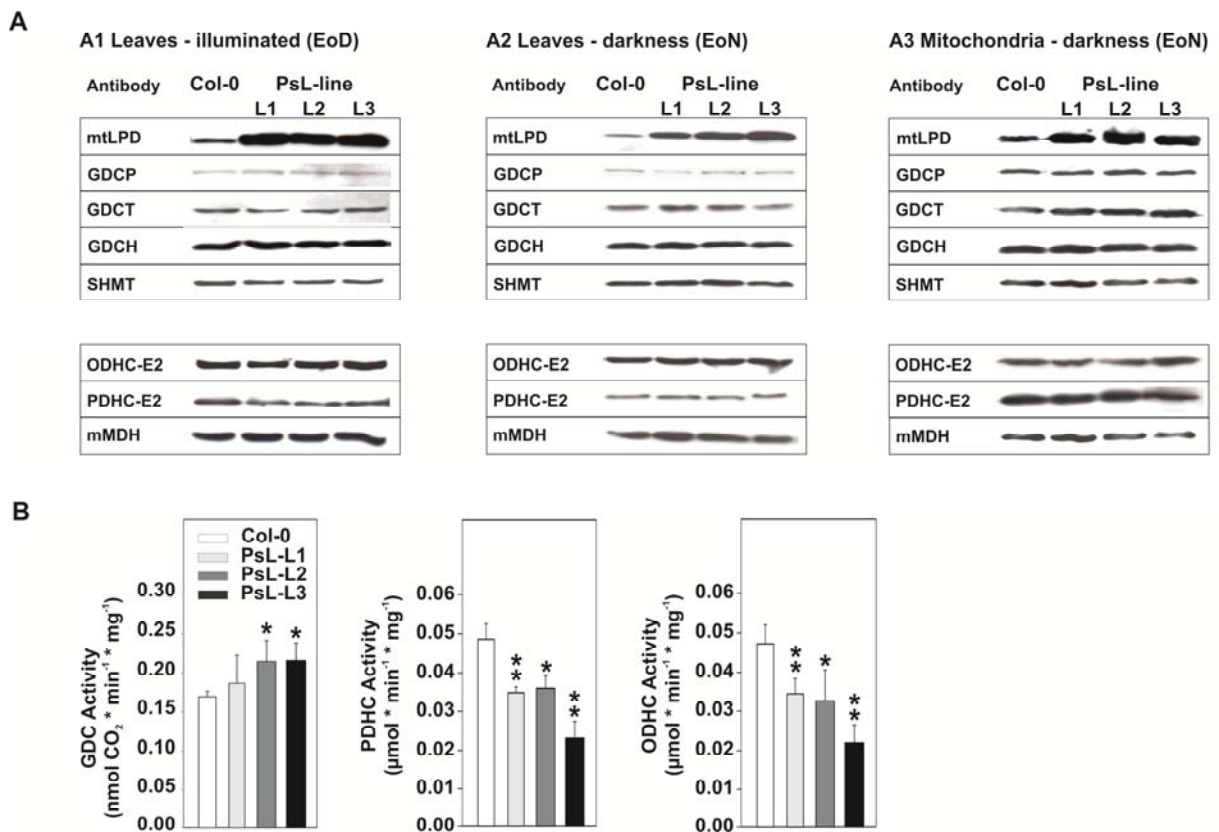

**Supplemental Figure 3.** Enzyme abundances and activities in *mtLPD* overexpressors at different times of the day/night-cycle.

Plants were grown under environmental controlled conditions with a photoperiod of 10/14 h and 20/18°C day/night, 75% relative humidity and a light intensity of ~120 μmol photons m<sup>-2</sup> s<sup>-1</sup>. **(A)** Immunoblotting analysis of GDC, PDHC and ODHC components from leaf samples at the end of the day (EoD), end of the night (EoN) and from isolated mitochondria. **(B)** Enzyme activities of GDC, PDHC and ODHC in isolated mitochondria. Values are means ± SD (N>3) from four technical replicates. Asterisks indicate values that were significantly different from the wild-type control based on Student's *t*-test (\* *p* < 0.05).

**Supplemental Table 1.** Absolute amino acid and selected organic acid contents in *mtLPD* overexpressors

Leaf material was harvested at the end of the light period from plants at growth stage 5.1 according to Boyes et al., (2001) and absolute steady-state contents of amino acids analysed by HPLC. Values are mean  $\pm$  SD of five independent biological replicates. Values in bold were significantly different from the wild-type control based on Student's *t*-test (\**p* < 0.05). Values for metabolites shown with a grey background were used in Figure 2.

| Leaf amino acid and selected organic acid contents in <i>mtLPD</i> overexpressors compared to wild-type plants |                   |                                        |                                       |                                       |
|----------------------------------------------------------------------------------------------------------------|-------------------|----------------------------------------|---------------------------------------|---------------------------------------|
| <i>Amino acids</i>                                                                                             |                   |                                        |                                       |                                       |
| Metabolite                                                                                                     |                   |                                        |                                       |                                       |
| ( $\mu\text{mol}\cdot\text{gFW}^{-1}$ )                                                                        | Col-0             | PsL-L1                                 | PsL-L2                                | PsL-L3                                |
| Alanine                                                                                                        | 0.897 $\pm$ 0.174 | 0.693 $\pm$ 0.135                      | <b>0.559 <math>\pm</math> 0.072*</b>  | <b>0.585 <math>\pm</math> 0.061*</b>  |
| Arginine                                                                                                       | 0.047 $\pm$ 0.008 | 0.055 $\pm$ 0.037                      | 0.067 $\pm$ 0.066                     | <b>0.028 <math>\pm</math> 0.002*</b>  |
| Asparagine                                                                                                     | 0.444 $\pm$ 0.013 | 0.521 $\pm$ 0.187                      | 0.439 $\pm$ 0.147                     | 0.355 $\pm$ 0.067                     |
| Aspartate                                                                                                      | 0.603 $\pm$ 0.048 | 0.621 $\pm$ 0.078                      | 0.555 $\pm$ 0.073                     | 0.648 $\pm$ 0.123                     |
| Glutamate                                                                                                      | 2.388 $\pm$ 0.333 | 3.321 $\pm$ 0.546                      | 2.503 $\pm$ 0.807                     | 3.091 $\pm$ 0.607                     |
| Glutamine                                                                                                      | 2.281 $\pm$ 0.254 | 2.127 $\pm$ 0.226                      | 1.924 $\pm$ 0.305                     | 2.409 $\pm$ 0.257                     |
| Glycine                                                                                                        | 1.367 $\pm$ 0.160 | <b>0.725 <math>\pm</math> 0.192*</b>   | <b>0.593 <math>\pm</math> 0.112*</b>  | <b>0.788 <math>\pm</math> 0.177*</b>  |
| Histidine                                                                                                      | 0.138 $\pm$ 0.025 | 0.131 $\pm$ 0.028                      | 0.100 $\pm$ 0.024                     | 0.117 $\pm$ 0.009                     |
| Isoleucine                                                                                                     | 0.029 $\pm$ 0.005 | 0.030 $\pm$ 0.006                      | <b>0.020 <math>\pm</math> 0.002*</b>  | 0.027 $\pm$ 0.001                     |
| Leucine                                                                                                        | 0.083 $\pm$ 0.025 | 0.039 $\pm$ 0.017                      | <b>0.037 <math>\pm</math> 0.003*</b>  | <b>0.036 <math>\pm</math> 0.003*</b>  |
| Lysine                                                                                                         | 0.009 $\pm$ 0.005 | 0.020 $\pm$ 0.020                      | 0.007 $\pm$ 0.001                     | 0.007 $\pm$ 0.0004                    |
| Methionine                                                                                                     | 0.009 $\pm$ 0.001 | <b>0.0009 <math>\pm</math> 0.0005*</b> | <b>0.001 <math>\pm</math> 0.0004*</b> | <b>0.001 <math>\pm</math> 0.0001*</b> |

|                               |                |                       |                       |                       |
|-------------------------------|----------------|-----------------------|-----------------------|-----------------------|
| Phenylalanine                 | 0.030 ± 0.001  | 0.037 ± 0.016         | 0.025 ± 0.009         | 0.023 ± 0.003         |
| Serine                        | 3.015 ± 0.398  | 2.478 ± 0.187         | 2.123 ± 0.594         | 2.398 ± 0.501         |
| Threonine                     | 0.827 ± 0.030  | 0.989 ± 0.212         | 0.754 ± 0.182         | 0.760 ± 0.106         |
| Thyrosine                     | 0.025 ± 0.007  | 0.012 ± 0.011         | 0.004 ± 0.0007        | 0.003 ± 0.0003        |
| Tryptophane                   | 0.007 ± 0.005  | 0.005 ± 0.02          | 0.006 ± 0.003         | 0.005 ± 0.0008        |
| Valine                        | 0.250 ± 0.091  | 0.234 ± 0.004         | 0.211 ± 0.053         | 0.230 ± 0.056         |
| Gly/Ser ratio                 | 0.498 ± 0.104  | <b>0.338 ± 0.036*</b> | <b>0.233 ± 0.064*</b> | <b>0.337 ± 0.094</b>  |
| Total                         | 11.791 ± 0.434 | 12.525 ± 1.318        | 9.926 ± 1.893         | 11.542 ± 1.832        |
| <i>Selected organic acids</i> |                |                       |                       |                       |
| Metabolite                    |                |                       |                       |                       |
| (nmol*mgFW <sup>-1</sup> )    | Col-0          | PsL-L1                | PsL-L2                | PsL-L3                |
| Malate                        | 0.71 ± 0.19    | <b>0.35 ± 0.06*</b>   | <b>0.33 ± 0.05*</b>   | <b>0.20 ± 0.05*</b>   |
| Succinate                     | 0.35 ± 0.03    | <b>0.21 ± 0.06*</b>   | <b>0.13 ± 0.03*</b>   | <b>0.15 ± 0.02*</b>   |
| Oxoglutarate                  | 0.42 ± 0.20    | <b>0.010 ± 0.002*</b> | <b>0.007 ± 0.002*</b> | <b>0.011 ± 0.002*</b> |

**Supplemental Table 2.**  $^{13}\text{C}$  enrichment in selected metabolites of primary metabolism

Leaf discs were generated from plants at growth stage 5.1 according to Boyes et al., (2001) after 6 h of illumination. These were further incubated in  $^{12}\text{C}$ - and  $^{13}\text{C}$ -glycine for 3 h under growth conditions and frozen until GC-MS analysis (for further details see material and methods section). Values are mean  $\pm$  SD of four independent biological and 2 technical replicates. Values in bold were significantly different from the wild-type control based on Student's *t*-test (\**p* < 0.05). Values for metabolites with a grey background were used in Figure 3.

| $^{13}\text{C}$ enrichment in selected metabolites after external glycine feeding (%) |                    |                                       |                                       |                                       |
|---------------------------------------------------------------------------------------|--------------------|---------------------------------------|---------------------------------------|---------------------------------------|
| Metabolite                                                                            |                    |                                       |                                       |                                       |
|                                                                                       | Col-0              | PsL-L1                                | PsL-L2                                | PsL-L3                                |
| Photorespiration                                                                      |                    |                                       |                                       |                                       |
| Glycolate                                                                             | 17.56 $\pm$ 1.25   | <b>4.98 <math>\pm</math> 0.75*</b>    | <b>1.54 <math>\pm</math> 0.23*</b>    | <b>1.87 <math>\pm</math> 0.14*</b>    |
| Glycine                                                                               | 85.98 $\pm$ 8.41   | <b>57.17 <math>\pm</math> 5.89*</b>   | <b>43.54 <math>\pm</math> 1.92*</b>   | <b>39.36 <math>\pm</math> 2.22*</b>   |
| Serine                                                                                | 342.71 $\pm$ 22.56 | <b>232.25 <math>\pm</math> 23.67*</b> | <b>273.96 <math>\pm</math> 26.40*</b> | <b>212.93 <math>\pm</math> 20.04*</b> |
| Glycerate                                                                             | 15.19 $\pm$ 1.10   | <b>9.58 <math>\pm</math> 1.50*</b>    | <b>12.51 <math>\pm</math> 0.98*</b>   | <b>13.41 <math>\pm</math> 0.48*</b>   |
| TCA cycle                                                                             |                    |                                       |                                       |                                       |
| Citrate                                                                               | 0.80 $\pm$ 0.11    | <b>1.70 <math>\pm</math> 0.21*</b>    | <b>1.69 <math>\pm</math> 0.34*</b>    | <b>1.42 <math>\pm</math> 0.32*</b>    |
| Succinate                                                                             | 3.77 $\pm$ 0.43    | <b>1.77 <math>\pm</math> 0.25*</b>    | <b>1.63 <math>\pm</math> 0.23*</b>    | <b>2.06 <math>\pm</math> 0.34*</b>    |
| Malate                                                                                | 23.58 $\pm$ 1.74   | <b>14.59 <math>\pm</math> 1.28*</b>   | <b>10.65 <math>\pm</math> 1.05*</b>   | <b>15.81 <math>\pm</math> 1.22*</b>   |
| Soluble sugars                                                                        |                    |                                       |                                       |                                       |
| Glucose                                                                               | 2.81 $\pm$ 0.14    | 2.90 $\pm$ 0.21                       | 2.24 $\pm$ 0.21                       | 2.52 $\pm$ 0.20                       |
| Sucrose                                                                               | 11.64 $\pm$ 0.70   | <b>15.18 <math>\pm</math> 1.43*</b>   | <b>14.90 <math>\pm</math> 1.04*</b>   | <b>13.89 <math>\pm</math> 1.25*</b>   |
| Fructose                                                                              | 3.39 $\pm$ 1.34    | <b>8.84 <math>\pm</math> 1.30*</b>    | <b>13.79 <math>\pm</math> 2.38*</b>   | <b>13.05 <math>\pm</math> 2.79*</b>   |

|             |              |                     |                      |                     |
|-------------|--------------|---------------------|----------------------|---------------------|
| Maltose     | 0.55 ± 0.55  | <b>2.96 ± 0.20*</b> | <b>2.96 ± 0.20*</b>  | <b>3.08 ± 0.26*</b> |
| Inositol    | 1.41 ± 0.08  | 1.30 ± 0.12         | 1.35 ± 0.08          | 1.29 ± 0.07         |
| Amino acids |              |                     |                      |                     |
| Glutamine   | 1.12 ± 0.07  | 1.42 ± 0.14         | 1.12 ± 0.06          | 1.20 ± 0.08         |
| Glutamate   | 3.81 ± 0.43  | 3.63 ± 0.48         | <b>2.71 ± 0.16*</b>  | 3.22 ± 0.23         |
| Isoleucine  | 38.86 ± 2.85 | <b>7.88 ± 0.99*</b> | <b>17.86 ± 1.80*</b> | 33.23 ± 4.36        |
| Lysine      | 2.33 ± 0.69  | <b>0.75 ± 0.18*</b> | <b>0.57 ± 0.16*</b>  | <b>0.47 ± 0.11*</b> |
| Threonine   | 2.94 ± 0.18  | 2.20 ± 0.40         | 2.22 ± 0.12          | 2.93 ± 0.22         |
| Valine      | 1.20 ± 0.08  | 1.21 ± 0.07         | 1.10 ± 0.07          | <b>1.63 ± 0.11*</b> |
